Running head: Ear-protectors and heartbeat tracking

## Reduction of auditory input improves performance on the heartbeat tracking task, but does not necessarily enhance interoception

Jennifer Todd, Farah Hina & Jane E. Aspell

School of Psychology and Sport Science, Anglia Ruskin University, Cambridge, UK

Abstract Word Count: 198

Manuscript Word Count: 3859

Tables and Figures: 3

Declarations of interest: none

Address correspondence to: Miss Jennifer Todd, School of Psychology and Sport Science, Anglia Ruskin, University, East Road, Cambridge, Cambridgeshire, CB1 1PT, UK. Email: [jenny.todd@pgr.anglia.ac.uk](mailto:jenny.todd@pgr.anglia.ac.uk).

## Abstract

Previous research utilising a between-subjects design indicates that the use of noise-dampening ear-protectors might enhance interoceptive accuracy (IAcc). In the present study, we further examined this effect using a repeated-measures, within-participants design, and investigated potential mechanisms that might explain the effect. 50 participants completed the heartbeat tracking task (HTT) with and without the use of ear-protectors, in a counter-balanced order. Participants were asked to count the number of heartbeats occurring in five discrete time intervals of 25, 35, 45, 55 and 95 seconds, without feeling for a manual pulse. HTT scores were significantly higher when ear-protectors were worn, and the improvement in performance was greatest for participants with lower baseline IAcc. Participants also performed more consistently across the five trials when wearing the ear-protectors. The ear-protectors were associated with significantly increased self-reported heartbeat audibility, concentration, and task-related confidence, and decreased levels of distractibility. Heartbeat audibility was also correlated with HTT performance when the ear-protectors were worn. The exteroceptive nature of the feedback from the ear-protectors therefore precludes the utility of this manipulation to assess causal hypotheses related to changes in IAcc. However, it may serve as a simple, non-invasive manipulation to assess the effects of externalised interoceptive signals.

## Highlights

- Ear-protectors elicit an improvement in performance on the heartbeat tracking task
- This improvement is greatest for participants with lower baseline accuracy
- The improvement is associated with the auditory perception of the heartbeat
- Prior use of ear-protectors did not result in later enhanced performance on the control condition without ear-protectors.

*Interoception* refers to the brain's processing of internal physiological signals (Craig, 2003). Information regarding the present condition of the body (e.g. heart rate, temperature, blood sugar levels) is detected, interpreted and integrated within the nervous system to affect the behaviour of an organism, with or without conscious awareness (Cameron, 2002). Interoceptive signalling is a crucial component of homeostatic functioning (Barrett, & Simmons, 2015), and has also been associated with aspects of higher order cognition, such as decision making (e.g., Dunn et al., 2010; Piech et al., 2017; Werner et al., 2013), and emotion perception and regulation (e.g., Herbert, Pollatos & Schandry, 2007; Kever, Pollatos, Vermeulen, & Grynberg, 2015; Pollatos, Matthias, & Keller, 2015). Altered interoception is also a feature of many clinical conditions (Khalsa et al., 2018; Quadt, Critchley & Garfinkel, 2018).

Research supports that interoception is a multi-faceted construct (Forkmann et al., 2016; Garfinkel, Seth, Barrett, Suzuki & Critchley, 2015; Khalsa et al., 2018), and scholars typically distinguish between three domains: *interoceptive accuracy* (IAcc), which describes the objective detection and tracking of internal bodily sensations with behavioural measures such as heartbeat perception tasks (e.g. Schandry, 1981; Whitehead, Drescher, Heiman & Blackwell, 1977); *interoceptive sensibility* (IS) which refers to self-reported awareness of internal bodily sensations via questionnaires (e.g. Mehling et al., 2012), or perceived task performance (Garfinkel et al., 2015); and finally *interoceptive awareness* (IAw), which refers to the 'metacognitive' correspondence between IAcc and confidence ratings (Garfinkel et al., 2015).

Investigations of IAcc have been dominated by assessments of cardiac perception accuracy, often to the exclusion of other bodily domains (Khalsa et al., 2018). Indeed, it is frequently implied that cardiac perception accuracy signifies a marker of overall interoceptive ability (Tsakiris & Critchley, 2016). Whilst some literature supports this notion (Herbert,

Muth, Pollatos & Herbert, 2012), it has not yet been fully explored (Khalsa et al., 2018). Moreover, the reliability of the heartbeat tracking task (HTT; Schandry, 1981) – the most commonly used measure of IAcc – has been heavily challenged recently. The task may be confounded by participants' abilities to estimate time (Shah, Hall, Catmur & Bird, 2016), participants' knowledge/expectations about their resting heart rate (Murphy, Millgate, et al., 2018; Knapp-Kline & Kline, 2005; Ring, Brener, Knapp & Mailloux, 2015), and affected by physiological factors such as age, body mass index (BMI), blood pressure, resting heart rate, and heart rate variability (Khalsa, Rudrauf, & Tranel, 2009; Murphy, Geary, Millgate, Catmur, & Bird, 2018; Zamariola, Maurage, Luminet, & Corneille, 2018). Furthermore, a number of problems have been identified regarding HTT scores. First, while HTT scores should theoretically be unbiased to error type (i.e., the over- or underestimation of heartbeats should be equally weighted), Zamariola and colleagues (2018) found that over 95% of scores reflect underestimation of heartbeats, and that the overestimation of heartbeats is disproportionately associated with higher HTT scores. Finally, the specific wording of the task instructions (Desmedt, Luminet & Corneille, 2018), the length of the time intervals used for the task (Zamariola et al., 2018; cf. Tsakiris, Ainley, Pollatos, & Herbert, 2019), and the equipment utilised to measure heartbeats (Murphy et al., 2019) can all have significant effects on task performance. Therefore, further research scrutinising and improving the task methodology is needed.

Whilst the available interoception literature predominantly focuses upon group differences in trait IAcc and IS, (e.g. Ateş Çöl, Sonmez & Vardar, 2016; Klabunde, Acheson, Boutelle, Matthews & Kaye, 2013; Pollatos et al., 2008), there is also evidence to suggest that interoceptive processing can be manipulated as a state variable, over both short and long-term periods. For example, short-term manipulations of IAcc include mirror self-observation (Ainley, Tajadura-Jiménez, Fotopoulou & Tsakiris, 2012), focusing upon self-referential

information (Ainley, Maister, Brokfeld, Farmer & Tsakiris, 2013), and performance-related feedback in a cardiac discrimination task (Piech et al. 2017). Meanwhile, long-term manipulations of IS and IAcc include meditation and mindfulness interventions (Bornemann, Herbert, Mehling & Singer, 2015; Fischer, Messner & Pollatos, 2017; Kok & Singer, 2017; c.f. Khalsa, Rudrauf, Hassanpour, Davidson, & Tranel, 2019; Parkin et al., 2014). Another potential manipulation of cardiac perception accuracy may involve reducing external auditory input. Indeed, in a recent quasi-experimental study, Hall, Lopes and Yu (2019) demonstrated that the use of noise-dampening ear-protectors resulted in significantly higher scores on the HTT (Schandry, 1981). However, due to the utilisation of a between-subjects study design and given the large variability in heartbeat detection scores (Murphy, Brewer, Hobson, Catmur, & Bird, 2018), it is not possible to ascertain from the work of Hall and colleagues (2019) whether IAcc can be manipulated within individuals by use of ear protectors. Indeed, whilst the difference in IAcc reported by Hall and colleagues (2019) may be a direct result of the ear-protectors, it could also be a reflection of pre-existing group differences in IAcc, or even factors that have associated with cardiac perception accuracy such as body BMI, heart rate variability, blood pressure, or knowledge of resting heartrate (Murphy, Geary, et al., 2018; Murphy, Millgate et al., 2018), particularly as allocation to conditions was not randomised. It was also unclear from the work of Hall and colleagues (2019) *why* the use of ear-protectors might increase interoceptive accuracy. One hypothesis is that the ear-protectors reduce background auditory noise, making the heartbeat more discriminable. Another possibility is that the protectors act as a resonant medium, audibly amplifying the heartbeat pulse or making it perceptible via tactile sensations caused by pressure on a blood vessel.

The primary aim of the present study was to assess whether the recent findings from Hall and colleagues (2019) could be replicated utilising a repeated-measures design, which would control for the possible confounding effects of individual differences previously outlined. We

expected that the use of noise-dampening ear-protectors would elicit a significant improvement in performance on the HTT. Secondly, we sought to explore potential mechanisms that might explain differences in performance across the two conditions, by asking participants to self-report: (1) levels of perceived task performance (task-related confidence); (2) the degree to which they could concentrate on the task; (3) the degree to which they felt they could 'hear' their heartbeat ('heartbeat audibility'); and (4), the degree to which they felt distracted during the task. Previous research has identified negative relationships between cardiac IAcc and age (Khalsa et al., 2009), BMI (Herbert, Blechert, Hautzinger, Matthias, & Herbert, 2013; Herbert & Pollatos, 2014) and resting heartrate (Zamariola et al., 2018), therefore, additional effects of these variables were also anticipated.

## Method

### 1. Participants

An *a priori* power analysis indicated that a sample of 27 participants would be sufficient to detect a medium-sized effect of the ear protectors upon HTT-scores, at  $\alpha = .05$ , with power at .80. To detect a medium-sized effect of the ear protectors upon the four VAS indices, 43 participants would be sufficient to achieve power at .80, with  $\alpha = .0125$ . In practice, a sample of 50 staff and students were recruited from Anglia Ruskin University (ARU). The sample was comprised of 21 men and 28 women, and one person who described their gender as 'other'. Participants were aged between 18 and 42 ( $M = 26.08 \pm 6.73$ ), and BMI values ranged from 16.30 to 34.80 kg/m<sup>2</sup> ( $M = 24.24 \pm 4.91$ ).

Participants were ineligible if they had any known auditory deficits, neurological/psychological conditions, or cardiovascular conditions. Participation was voluntary, and participants were not offered any form of remuneration.

### 2. Materials and Apparatus

A PowerLab device (AD Instruments, Oxford, Oxfordshire, UK) was connected to a PC to record participants' electrocardiograms (ECG) and hence their heartbeats throughout the experiment; data was recorded using LabChart 8 software. Three disposable electrocardiography (ECG) electrodes (positioned on the chest in standard three-lead configuration), relayed R-wave output through shielded wires. The electrodes were self-attached by participants under their clothes, guided by a visual diagram.

A pair of 3M Peltor Optime adjustable ear-protectors, with a single number rating (SNR) noise reduction of 28 dB (recommended for moderate industrial noise), were used during the experimental condition.

### **3. Design**

All participants were asked to complete the HTT (Schandry, 1981; see section 4) under two conditions: during the experimental condition, participants wore the ear-protectors described in section 2.2, and during the control condition participants completed the task without the ear-protectors. The conditions were completed in two separate blocks: participants randomly allocated even numbers completed the experimental condition prior to the control condition, whilst participants who were allocated odd numbers completed the control condition prior to the experimental condition.

### **4. Procedure**

The study was approved by the authors' university ethics committee prior to data collection. All testing took place in a university laboratory, with only the researcher and the participant present. Participants were first presented with a written information sheet, and then asked to provide written informed consent. Throughout the HTT, participants were seated in an upright position facing away from the experimenter. Participants were asked to attempt to sense their heart beating in the inside of their body, without using a manual pulse or watch. Consistent with the recommendation of Desmedt and colleagues (2018),

participants were asked to count and report only the number of heartbeats actually felt, without attempts to guess heart rate. Participants were asked to count the number of heartbeats occurring in five discrete time intervals of 25, 35, 45, 55 and 95 seconds (presented in a random order across participants). Auditory ‘start’ and ‘stop’ cues indicated the beginning and end of each trial. Prior to the commencement of the experimental condition, it was ascertained that the participants were comfortable wearing the ear-protectors, and that they could accurately hear and respond to the auditory start and stop signals. Participants were unaware of how long they were counting for, and no performance-related feedback was given.

Immediately following the completion of each HTT block (experimental/control), participants were asked to respond to the following questions using a computer which was situated adjacent to the experimental set-up:

1. How confident are you in your responses for the last five trials?
2. To what extent did you feel you could concentrate during the last five trials?
3. To what extent did you feel you could ‘hear’ your heartbeat during the last five trials?
4. To what extent did you feel you were distracted by background noises during the last five trials?

The questions were presented in a random order across participants. Responses were recorded on a visual analogue scale (VAS) that was 10cm long which participants could mark using a computer mouse. The left end was marked “Not at all” and the right end was marked “Completely”. Participants were also offered the opportunity to write any additional comments about the tasks. Finally, participants were asked to complete a demographic questionnaire. At the end of the study, all participants were presented with written debriefing information.



## Results

### 5.1 Transformation of raw data

Interoceptive accuracy scores from the HTT were calculated using the following equation:  $IAcc = (1 - [\text{recorded heartbeats} - \text{counted heartbeats}]/\text{recorded heartbeats})$ , as in Schandry (1981). Scores were calculated for each trial, and then averaged across five trials to generate an overall interoceptive accuracy score for each condition. Absolute values were utilised, so that scores range from 0 to 1 and those closer to 1 indicate greater IAcc.

Meanwhile, each VAS score ranged from 0 and 100, with scores incrementing at a rate of 1 point per mm, such that positioning the cursor at the far left of the scale (“Not at all”) was assigned a score of 0, and positioning the cursor at the far right of the scale (“Completely”) was assigned a score of 100 (as in Pfeifer et al., 2017).

### 5.2 Interoceptive Accuracy

A paired samples *t*-test was used to determine whether there was a statistically significant difference in interoceptive accuracy when the HTT was completed with and without the use of ear-protectors. There were no outliers, and the difference scores for the headphone and control conditions were normally distributed (as assessed by Shapiro-Wilk’s test,  $p = .706$ ). Participants demonstrated greater interoceptive accuracy when using ear-protectors ( $M = .86 \pm .12$ ), compared to without ( $M = .59 \pm .20$ ), a statistically significant difference in heartbeat perception scores of .26 (95% CI, .204 to .325),  $t(49) = 8.764$ ,  $p < .0005$ ,  $d = 1.24$ .

An independent samples *t*-test was used to determine whether there was a statistically significant difference in interoceptive accuracy scores between participants who completed the control condition first and second. There were no outliers, and data were normally distributed for both groups (Shapiro-Wilk’s test:  $p = .657$ ,  $.168$ , for each group). Scores for the control condition were slightly higher for participants who completed it before the use of

the ear-protectors ( $M = .60 \pm .17$ ) compared to those who completed it after ( $M = .58 \pm .23$ ), but the difference of .020 (95% CI, .094 to .134) was not statistically significant,  $t(48) = -1.112$ ,  $p = .725$ ,  $d = .099$ . Meanwhile, scores for the experimental condition were negatively skewed (the z-scores for skewness were -3.55 and -3.91, and Shapiro-Wilk's test:  $p < .001$  for each group), therefore a Mann-Whitney U test was used. Median interoceptive accuracy scores did not significantly differ between groups  $U = 392$ ,  $z = 1.543$ ,  $p = .123$ .

In order to assess whether scores for the headphones condition differed according to baseline performance on the control condition, the HTT performance data were split into two groups by the median (as in Ainley et al., 2012; 2013), such that participants who scored  $\leq .58$  were classified as 'low' cardiac perceivers, and participants who scored  $\geq .59$  were classified as 'high' cardiac perceivers (for each group,  $n = 25$ ). The data for the headphones condition were not normally distributed (Shapiro-Wilk's test:  $p \leq .001$  for each group), therefore a Mann Whitney-U test was utilised. There was no statistically significant difference between the two groups,  $U = 365.00$ ,  $z = 1.019$ ,  $p = .308$ . We also computed difference scores (i.e. performance on the control condition, subtracted from performance when the task was completed with headphones) to assess whether the effect of the headphones was greater for participants with lower baseline performance on the control condition. The difference scores were normally distributed (Shapiro-Wilk's test:  $p = .706$ ) and there were no outliers. There was an effect of baseline sensitivity, such that participants who were classified as 'low' cardiac perceivers had a greater mean improvement (.40), than participants who were classified as 'high' cardiac perceivers (.13), a statistically significant mean difference of .27, (95% CI, .179 to 3.66),  $t(48) = 5.86$ ,  $p < .0005$ ,  $d = 1.66$ .

### 5.3 Task reliability

Friedman tests were run to determine if task performance differed by trial length (25, 35, 45, 55 and 95 seconds) for each condition. There were no statistically significant

differences for either the control condition,  $\chi^2(4) = 1.081, p = .897$ , or the experimental condition,  $\chi^2(4) = 1.896, p = .755$ . Cronbach's  $\alpha$  was .85 for the control condition, and .92 for the experimental condition.

#### 5.4 Visual Analogue Scales

Wilcoxon signed-rank tests were used to assess the self-reported data from the VASs. As can be seen from Table 1, the use of ear-protectors elicited significant changes in four aspects of HTT experience after accounting Bonferroni correction ( $p = .05/4 = .0125$ ): HTT-related confidence, HTT-related concentration, heartbeat audibility, and HTT-related distractibility.

Next, Spearman's correlations were conducted to ascertain the relationship between performance on the HTT, the self-reported VAS variables, and additional demographic factors (see Table 2). Given the large number of comparisons, we controlled for false discovery rate (FDR) using the Benjamini and Hochberg (1995) procedure. Additionally, differences in the pattern of the correlation coefficients across the experimental and control conditions were compared by computing Hittner, May, and Silver's (2003) modification of Dunn and Clark's (1969)  $z$ , using the cocor package (Diedenhofen, & Musch, 2015) in *R* (Rosseel, 2012). Performances across the two conditions were not strongly correlated, and below the threshold for statistical significance. Of all the VAS variables, heartbeat audibility had the strongest correlation with task performance during the experimental condition ( $r_s = .456$ ; see Table 2). However, it was not significantly associated with IAcc within the control condition. Regarding the remaining VAS variables, there was a strong, significant ( $r_s = .798$ ;  $p > .001$ ) correlation between confidence and audibility within the experimental condition. Heartbeat audibility and concentration ratings were also significantly associated ( $r_s = .605$ ;  $p > .001$ ) within the experimental condition. There were significant, positive associations between performance-related confidence ratings and HTT scores, and between concentration

ratings and HTT scores, and the associations did not differ significantly across the two conditions (Table 3). Conversely, self-reported distraction ratings were not significantly associated with IAcc on either condition (Table 3). Age was significantly, positively correlated with IAcc, and negatively correlated with resting heartrate within the experimental condition, but the variables were not significantly associated within the control condition.

## Discussion

The aim of this study was to assess whether the recent findings from Hall and colleagues (2019), regarding the effects of ear protectors on IAcc, could be replicated using a repeated-measures, within-participant design. In accordance with our hypothesis, there was a significant increase in heartbeat tracking task (HTT) scores when the task was performed using ear-protectors compared to without. As we expected, the improvements in performance were significantly greater for participants who had lower ('baseline') scores on the control condition. We also sought to assess possible mechanisms which might explain this effect. In doing so, we found that the ear-protectors were associated with participants' ratings of perceived task performance; the degree to which participants felt they could concentrate; heartbeat audibility; and, the degree to which participants felt distracted throughout the task.

Of all the self-reported variables, heartbeat audibility ratings were most strongly correlated with task performance during the experimental condition. This suggests that participants who were able to hear their heartbeat more clearly performed better on the task during the experimental condition. This was not the case during the control condition. Furthermore, performances in the two conditions were only weakly correlated, suggesting that participants who performed well in one condition did not necessarily perform well in the other. The difference in Cronbach  $\alpha$  values between the two conditions also indicates that participants tended to perform more consistently during the experimental condition. Taken

together, these findings may reflect that the two conditions are actually different tasks performed using different cues. Specifically, it appears that the ear-protectors likely act as a resonant medium, audibly amplifying the heartbeat or making it perceptible via tactile sensations caused by pressure on a blood vessel. As one participant commented after wearing the ear-protectors, “it [my heartbeat] was easier to hear in this condition, but the beat was in my head, not my heart.” By amplifying the sound of the heartbeat, the ear-protector manipulation transforms the HTT into a task that is inherently exteroceptive. It also likely changes the body location in which the heartbeat is experienced (it is usually experienced in the chest region, and sometimes the neck; Nummenmaa, Hari, Hietanen, & Glerean, 2018). Therefore, whilst scores on the HTT tend to improve as a result of the ear-protectors, it cannot be asserted that the manipulation increases IAcc (as suggested by Hall et al., 2019), given that IAcc purportedly measures sensitivity to *internal* bodily signals.

Furthermore, though some studies have reported the use of ear-protectors/headphones to reduce distraction during the HTT (e.g. Ainley et al., 2012; 2013), the present findings suggest that the HTT should not be conducted using ear-protectors if it is to be used as a measure of IAcc. This finding should also be considered within the context of other recent studies, which have highlighted the need for exacting protocols surrounding HTT procedure and equipment (Desmedt et al., 2018; Murphy et al., 2019). Indeed, given the large body of further evidence indicating HTT-related confounds (e.g., Murphy, Millgate, et al., 2018; Ring et al., 2015), it is advisable that the HTT is used cautiously, and with appropriate controls (e.g., Murphy, Geary et al., 2018). Nevertheless, there is potential utility in the ear-protector HTT manipulation for researchers who wish to examine the interplay between interoceptive and exteroceptive cues, or the effects of ‘externalised’ interoceptive signals. For example, previous research has identified that externalised heartbeat signals affect bodily self-consciousness (Aspell et al., 2013), chronic pain (Solca et al., 2018), and social preferences

such as altruism and fairness (Lenggenhager, Azevedo, Mancini, & Aglioti, 2013). The ear-protector manipulation could serve as a simple, non-invasive way to ‘externalise’ interoceptive processing. Indeed, within the present study some participants reported that the ear-protectors amplified other bodily processes too, for example one participant commented that “breathing and swallowing became suddenly distracting”.

In addition to the effect on heartbeat audibility, use of the ear-protectors was also associated with significant increases in performance-related confidence; increases in the extent to which participants felt they could concentrate during the task; and decreases in the extent to which participants felt distracted during the task. It is therefore important to note that the effect of the ear-protectors upon HTT scores is not solely due to the amplification of the heartbeat sound. Interestingly, however, the ratings for task-related confidence were strongly correlated with heartbeat audibility during the experimental condition, and the magnitude of the association differed significantly across the two conditions. These findings indicate that improvements participants experienced greater performance-related confidence when the heartbeat sound was more audible.

In contrast with previous research (Herbert et al., 2013; Herbert & Pollatos, 2014), we did not find BMI to be significantly correlated with performance in either condition. This may be due to homogeneity within the sample: whilst BMI values ranged from 16.3 (‘underweight’) to 34.3 (‘obese’), the majority of participants (70 %) had BMI values between 18.5 and 24.5 (‘healthy weight’). Meanwhile, age and resting heartrate were negatively correlated with tracking task performance, but only within the experimental condition. We also failed to detect a statistically significant effect of trial length upon task performance (as documented by Zamariola et al., 2018), for either condition in the present study, despite the additional inclusion of two lengthier trials. It is possible, given that the sample in the present study was considerably smaller than in the study by Zamariola and

colleagues (2018), that our finding may reflect a reduction in statistical power. Nevertheless, Tsakiris and colleagues (2019) also failed to replicate the finding from Zamariola and colleagues (2018), and contend that Zamariola and colleagues' (2018) results are the artefactual product of a lack of counterbalancing across trial lengths.

Overall, the findings from the present study support the findings of Hall and colleagues (2019) utilising a within-participants repeated-measures design. However, our results suggest that the associated improvement in performance on the heartbeat tracking task is, at least partially, due to the ear-protectors acting as a resonant medium, providing amplification of the heartbeat sound. The exteroceptive nature of the feedback from the ear-protectors therefore precludes the utility of this manipulation to assess causal hypotheses related to changes in IAcc (i.e., it would not be possible to use the ear-protectors to assess the effect of increased cardiac perception accuracy on an outcome variable). However, the manipulation may serve as a simple, non-invasive paradigm to assess the interplay between interoceptive and exteroceptive cues, or the effects of 'externalised' interoceptive signals (e.g. Aspell et al., 2013; Lenggenhager et al., 2013).

## References

- Ainley, V., Maister, L., Brokfeld, J., Farmer, H., & Tsakiris, M. (2013). More of myself: Manipulating interoceptive awareness by heightened attention to bodily and narrative aspects of the self. *Consciousness and Cognition*, *22*, 1231-1238. doi:10.1016/j.concog.2013.08.004
- Ainley, V., Tajadura-Jiménez, A., Fotopoulou, A., & Tsakiris, M. (2012). Looking into myself: Changes in interoceptive sensitivity during mirror self-observation. *Psychophysiology*, *49*, 1672-1676. doi:10.1111/j.1469-8986.2012.01468.x
- Aspell, J. E., Heydrich, L., Marillier, G., Lavanchy, T., Herbelin, B., & Blanke, O. (2013). Turning body and self inside out: Visualized heartbeats alter bodily self-consciousness and tactile perception. *Psychological Science*, *24*, 2445-2453. doi: 10.1177/0956797613498395
- Ates Col, I., Sonmez, M., & Vardar, M. (2016). Evaluation of Interoceptive awareness in Alcohol-Addicted Patients. *Archives of Neuropsychiatry*, *53*, 17-22. doi:10.5152/npa.2015.9898
- Benjamini, Y., & Hochberg, Y. (1995). Controlling the false discovery rate: A practical and powerful approach to multiple testing. *Journal of the Royal Statistical Society Series B*, *57*, 289-300. doi:10.1111/j.2517-6161.1995.tb02031.x
- Bornemann, B., Herbert, B. M., Mehling, W. E., & Singer, T. (2015). Differential changes in self-reported aspects of interoceptive awareness through 3 months of contemplative training. *Frontiers in Psychology*, *5*, 1504. doi: 10.3389/fpsyg.2014.01504
- Cameron, O. G. (2002). *Visceral sensory neuroscience: Interoception*. Oxford: Oxford University Press.



- Craig, A. D. (2003). Interoception: The sense of the physiological condition of the body. *Current Opinion in Neurobiology*, *13*, 500-505. doi:10.1016/s0959-4388(03)00090-4.
- Desmedt, O., Luminet, O., & Corneille, O., (2018). The Heartbeat Counting Task largely involves non-interoceptive processes: Evidence from both the original and an adapted counting task. *Biological Psychology*, *138*, 185-188. doi:10.1016/j.biopsycho.2018.09.004
- Diedenhofen, B. & Musch, J. (2015). cocor: A Comprehensive Solution for the Statistical Comparison of Correlations. *PLoS ONE*, *10*: e0121945. doi:10.1371/journal.pone.0121945
- Dunn, O. J., & Clark, V. (1969). Correlation coefficients measured on the same individuals. *Journal of the American Statistical Association*, *64*, 366-377. doi:10.1080/01621459.1969.10500981
- Dunn, B. D. Galton, H. C., Morgan, R., Evans, D., Oliver, C., Meyer, M., ... & Dalgleish, T. (2010) Listening to your heart. How interoception shapes emotion experience and intuitive decision making. *Psychological Science* *21*, 1835–1844. doi:10.1177/0956797610389191
- Fischer, D., Messner, M., & Pollatos, O. (2017). Improvement of interoceptive processes after an 8-week body scan intervention. *Frontiers in Human Neuroscience*, *11*, 452. doi:10.3389/fnhum.2017.00452
- Forkmann, T., Scherer, A., Meessen, J., Michal, M., Schächinger, H., Vogeles, C., & Schulz, A. (2016). Making sense of what you sense: Disentangling interoceptive awareness, sensibility and accuracy. *International Journal of Psychophysiology*, *109*, 71-80. doi:10.1016/j.ijpsycho.2016.09.019

- Garfinkel, S. N., Seth, A. K., Barrett, A. B., Suzuki, K., & Critchley, H. D. (2015). Knowing your own heart: Distinguishing interoceptive accuracy from interoceptive awareness. *Biological Psychology*, *104*, 65-74. doi:10.1016/j.biopsycho.2014.11.004
- Hall, J. K., Lopes, B., & Yu, H. (2019). Interoception enhanced via the ears? A Quasi-Experimental Study of the Impact of Noise-Dampening Ear-Protectors on Heartbeat Perception. *Journal of Psychophysiology*, *33*, 165-170. doi: 10.1027/0269-8803/a000219
- Herbert, B. M., Blechert, J., Hautzinger, M., Matthias, E., & Herbert, C. (2013). Intuitive eating is associated with interoceptive sensitivity: Effects on body mass index. *Appetite*, *70*, 22-30. doi:10.1016/j.appet.2013.06.082
- Herbert, B. M., Muth, E. R., Pollatos, O., & Herbert, C. (2012). Interoception across modalities: On the relationship between cardiac awareness and the sensitivity for gastric functions. *PloS one*, *7*, e36646. doi:10.1371/journal.pone.0036646
- Herbert, B. M., & Pollatos, O. (2014). Attenuated interoceptive sensitivity in overweight and obese individuals. *Eating Behaviors*, *15*, 445-448. doi:10.1016/j.eatbeh.2014.06.002
- Hittner, J. B., May, K., & Silver, N. C. (2003). A Monte Carlo evaluation of tests for comparing dependent correlations. *The Journal of General Psychology*, *130*, 149-168. doi:10.1080/00221300309601282
- Kever, A., Pollatos, O., Vermeulen, N., & Grynberg, D. (2015). Interoceptive sensitivity facilitates both antecedent-and response-focused emotion regulation strategies. *Personality and Individual Differences*, *87*, 20-23. doi:10.1016/j.paid.2015.07.014
- Khalsa, S. S., Rudrauf, D., Hassanpour, M. S., Davidson, R. J., & Tranel, D. (2019). The practice of meditation is not associated with improved interoceptive awareness of the heartbeat. *Psychophysiology*. doi:10.1111/psyp.13479. Advanced online publication.

- Khalsa, S. S., Rudrauf, D., & Tranel, D. (2009). Interoceptive awareness declines with age. *Psychophysiology*, *46*, 1130-1136. doi:10.1111/j.1469-8986.2009.00859.x
- Klabunde, M., Acheson, D., Boutelle, K., Matthews, S., & Kaye, W. (2013). Interoceptive sensitivity deficits in women recovered from bulimia nervosa. *Eating Behaviors*, *14*, 488-492. doi:10.1016/j.eatbeh.2013.08.002
- Knapp-Kline, K. & Kline, J.P. (2005). Heart rate, heart rate variability, and heartbeat detection with the method of constant stimuli: slow and steady wins the race. *Biological Psychology* *69*(3): 387-96. doi:10.1016/j.biopsycho.2004.09.002
- Kok, B. E., & Singer, T. (2017). Phenomenological fingerprints of four meditations: Differential state changes in affect, mind-wandering, meta-cognition, and interoception before and after daily practice across 9 months of training. *Mindfulness*, *8*, 218-231. doi:10.1007/s12671-016-0594-9.
- Lenggenhager, B., Azevedo, R. T., Mancini, A., & Aglioti, S. M. (2013). Listening to your heart and feeling yourself: effects of exposure to interoceptive signals during the ultimatum game. *Experimental Brain Research*, *230*, 233-241. doi:10.1007/s00221-013-3647-5
- Mehling, W. E., Price, C., Daubenmier, J. J., Acree, M., Bartmess, E., & Stewart, A. (2012). The multidimensional assessment of interoceptive awareness (MAIA). *PLOS One*, *7*, e48230. doi:10.1371/journal.pone.0048230
- Murphy, J., Brewer, R., Hobson, H., Catmur, C., & Bird, G. (2018). Is alexithymia characterised by impaired interoception? Further evidence, the importance of control variables, and the problems with the Heartbeat Counting Task. *Biological Psychology*, *136*, 189-197. doi:10.1016/j.biopsycho.2018.05.010

- Murphy, J., Brewer, R., Coll, M. P., Plans, D., Hall, M., Shiu, S. S., ... & Bird, G. (2019). I feel it in my finger: Measurement device affects cardiac interoceptive accuracy. *Biological Psychology*, *148*, 107765. doi:10.1016/j.biopsycho.2019.107765
- Murphy, J., Geary, H., Millgate, E., Catmur, C., & Bird, G. (2018). Direct and indirect effects of age on interoceptive accuracy and awareness across the adult lifespan. *Psychonomic Bulletin & Review*, *25*, 1193-1202. doi:10.3758/s13423-017-1339-z
- Murphy, J., Millgate, E., Geary, H., Ichijo, E., Coll, M. P., Brewer, R., ... & Bird, G. (2018). Knowledge of resting heart rate mediates the relationship between intelligence and the heartbeat counting task. *Biological Psychology*, *133*, 1-3. doi:10.1016/j.biopsycho.2018.01.012.
- Nummenmaa, L., Hari, R., Hietanen, J. K., & Glerean, E. (2018). Maps of subjective feelings. *Proceedings of the National Academy of Sciences*, *115*, 9198-9203. doi: 10.1073/pnas.1807390115.
- Parkin, L., Morgan, R., Rosselli, A., Howard, M., Sheppard, A., Evans, D., ... & Dunn, B. (2014). Exploring the relationship between mindfulness and cardiac perception. *Mindfulness*, *5*, 298-313. doi:10.1007/s12671-012-0181-7
- Pfeifer, G., Garfinkel, S. N., van Praag, C. D. G., Sahota, K., Betka, S., & Critchley, H. D. (2017). Feedback from the heart: Emotional learning and memory is controlled by cardiac cycle, interoceptive accuracy and personality. *Biological Psychology*, *126*, 19-29. doi:10.1016/j.biopsycho.2017.04.001
- Piech, R. M., Strelchuk, D., Knights, J., Hjälmheden, J. V., Olofsson, J. K., & Aspell, J. E. (2017). People with higher interoceptive sensitivity are more altruistic, but improving interoception does not increase altruism. *Scientific Reports* *7*, 15652. doi:10.1038/s41598-017-14318-8

- Pollatos, O., Matthias, E., & Keller, J. (2015). When interoception helps to overcome negative feelings caused by social exclusion. *Frontiers in Psychology, 6*, 786. doi:10.3389/fpsyg.2015.00786
- Quadt, L., Critchley, H. D., & Garfinkel, S. N. (2018). The neurobiology of interoception in health and disease. *Annals of the New York Academy of Sciences*, 1-17. doi: 10.1111/nyas.13915
- Ring, C., Brener, J., Knapp, K., & Mailloux, J. (2015). Effects of heartbeat feedback on beliefs about heart rate and heartbeat counting: a cautionary tale about interoceptive awareness. *Biological Psychology, 104*, 193-198. doi:10.1016/j.biopsycho.2014.12.010.
- Rosseel, Y. (2012). lavaan: An R package for structural equation modeling. *Journal of Statistical Software, 48*, 1-36.
- Schandry, R. (1981). Heart beat perception and emotional experience. *Psychophysiology, 18*, 483-488. doi:10.1111/j.1469-8986.1981.tb02486.x
- Shah, P., Hall, R., Catmur, C., & Bird, G. (2016). Alexithymia, not autism, is associated with impaired interoception. *Cortex, 81*, 215-220. doi: 10.1016/j.cortex.2016.03.021
- Solcà, M., Ronchi, R., Bello-Ruiz, J., Schmidlin, T., Herbelin, B., Luthi, F., ... & Guggisberg, A.G., (2018). Heartbeat-enhanced immersive virtual reality to treat complex regional pain syndrome. *Neurology, 91*, e479-e489. doi:10.1212/WNL.0000000000005905
- Tsakiris, M., & Critchley, H. (2016). Interoception beyond homeostasis: affect, cognition and mental health. *Philosophical Transactions of the Royal Society B, 371*: 20160002. doi:10.1098/rstb.2016.0002
- Tsakiris, M., Ainley, V., Pollatos, O., & Herbert, B. (2019). Comment on “Zamariola et al., (2018), Interoceptive accuracy scores are problematic: Evidence from simple

bivariate correlations” - The empirical data base, the conceptual reasoning and the analysis behind this statement are misconceived and do not support the authors’ conclusions. *PsyArXiv Preprints*. doi:10.31234/osf.io/wdehr

Werner, N. S., Schweitzer, N., Meindl, T., Duschek, S., Kambeitz, J., & Schandry, R.

(2013). Interoceptive awareness moderates neural activity during decision-making. *Biological Psychology*, *94*, 498-506. doi:10.1016/j.biopsycho.2013.09.002

Whitehead, W. E., Drescher, V. M., Heiman, P., & Blackwell, B. (1977). Relation of heart rate control to heartbeat perception. *Biofeedback and Self-Regulation*, *2*, 371-392. doi:10.1007/bf0099862

Zamariola, G., Maurage, P., Luminet, O., & Corneille, O. (2018). Interoceptive accuracy scores from the heartbeat counting task are problematic: Evidence from simple bivariate correlations. *Biological Psychology*, *137*, 12-17. doi:10.1016/j.biopsycho.2018.06.006

Table 1. *The number of participants reporting an altered heartbeat tracking task experience as a result of the noise dampening ear protectors, and results of Wilcoxon signed-rank tests.*

| Aspect of HTT experience               | Reported Increase ( <i>n</i> ) | Reported Decrease ( <i>n</i> ) | No change ( <i>n</i> ) | Control condition median rating | Experimental condition median rating | Median change | <i>z</i> | <i>p</i> |
|----------------------------------------|--------------------------------|--------------------------------|------------------------|---------------------------------|--------------------------------------|---------------|----------|----------|
| Performance-related confidence ratings | 30                             | 7                              | 3                      | 50.00                           | 72.50                                | 16.00         | 5.16     | < .0005  |
| Task-related concentration ratings     | 39                             | 11                             | 0                      | 60.00                           | 80.00                                | 21.50         | 4.67     | < .0005  |
| Heartbeat audibility                   | 44                             | 3                              | 3                      | 27.50                           | 80.00                                | 30.00         | 5.36     | < .0005  |
| Distraction                            | 6                              | 32                             | 12                     | 20.00                           | 0.00                                 | -12.00        | 4.31     | < .0005  |

*Notes.* *N* = 50, HTT = Heartbeat Tracking Task.

Table 2. *Correlations between Interoceptive Accuracy, heartbeat tracking task performance-judgements, and demographic variables within the experimental condition (top diagonal) and within the control condition (bottom diagonal).*

|                            | (1)    | (2)    | (3)    | (4)    | (5)     | (6)     | (7)   | (8)     |
|----------------------------|--------|--------|--------|--------|---------|---------|-------|---------|
| (1) Interoceptive Accuracy | .138   | .400** | .342*  | .456** | -.225   | .405**  | -.103 | -.433** |
| (2) Confidence             | .389** | .538** | .720** | .798** | -.366** | .071    | -.062 | -.324*  |
| (3) Concentration          | .347*  | .825** | .418** | .605** | -.504** | -.134   | -.122 | -.109   |
| (4) Audibility             | .178   | .533** | .458** | .346*  | -.246   | .019    | -.208 | -.237   |
| (5) Distracted             | .050   | -.185  | -.307* | -.210  | .323*   | .112    | -.175 | .092    |
| (6) Age                    | -.049  | -.105  | -.062  | -.317* | <.001   |         | .114  | -.491** |
| (7) BMI                    | .079   | -.187  | .137   | .205   | -.211   | .114    |       | -.059   |
| (8) Resting Heartrate      | .035   | -.065  | -.130  | .178   | .150    | -.491** | -.059 |         |

Notes.  $N = 50$ ; \* $p$ -FDR < .05; \*\* $p$ -FDR < .01. BMI = Body mass index.



Table 3.  $z_{observed}$  values and associated  $p$  values for comparison of the correlation coefficients across the experimental and control conditions.

|                            | (1) | (2)  | (3)   | (4)  | (5)    | (6)   | (7)    | (8)   |
|----------------------------|-----|------|-------|------|--------|-------|--------|-------|
| (1) Interoceptive Accuracy |     | 0.07 | -0.03 | 1.58 | -1.453 | 2.47  | -0.953 | -2.57 |
|                            |     | .474 | .977  | .113 | .146   | .013  | .341   | .010  |
| (2) Confidence             |     |      | -1.49 | 2.41 | -1.01  | 0.92  | 0.66   | -1.40 |
|                            |     |      | .136  | .016 | .315   | .057  | .509   | .162  |
| (3) Concentration          |     |      |       | 1.00 | 1.18   | -0.38 | -1.36  | 0.11  |
|                            |     |      |       | .317 | .237   | .705  | .174   | .912  |
| (4) Audibility             |     |      |       |      | -0.20  | 1.80  | -2.19  | -2.20 |
|                            |     |      |       |      | .845   | .072  | .029   | .028  |
| (5) Distracted             |     |      |       |      |        | 0.58  | 0.19   | -0.31 |
|                            |     |      |       |      |        | .561  | .847   | .760  |
| (6) Age                    |     |      |       |      |        |       |        |       |
| (7) BMI                    |     |      |       |      |        |       |        |       |
| (8) Resting Heartrate      |     |      |       |      |        |       |        |       |

Notes. BMI = Body mass index.
